# Supplementary material for: Design, synthesis, crystal structure, photophysical behavior and aggregation-induced emission of a novel pyrene scaffold multifunctional Schiff base ligand: inhibition of digestive enzymes and docking studies
Source: Royal Society of Chemistry journal article supplement (doi:10.1039/d3nj02148c), 2023-01-01
Supplement: d3nj02148c1.pdf [file d3nj02148c1.pdf]

## Supplementary Information

### **Design, synthesis, crystal structure, photophysics and aggregation-induced emission of a novel pyrene scaffold multifunctional Schiff base ligand: Inhibition of digestive enzymes and docking studies**

**Naba Kr Mandal<sup>a</sup>, Priyanka Arya<sup>b</sup>, Neera Raghav<sup>b</sup>, Shubhamoy Chowdhury<sup>c</sup>, Jnan Prakash Naskar<sup>a,\*</sup>**

<sup>a</sup>Department of Chemistry, Jadavpur University, Kolkata 700 032, India,

<sup>b</sup>Department of Chemistry, Kurukshetra University, Kurukshetra 136 119 (Haryana), India

<sup>c</sup>Department of Chemistry, Gour Banga University, Malda, West Bengal 732 103, India.

\*Corresponding author: Jnan Prakash Naskar

Fax: +91 33 2414 6223; E-mail: [jpnaskar@rediffmail.com](mailto:jpnaskar@rediffmail.com)

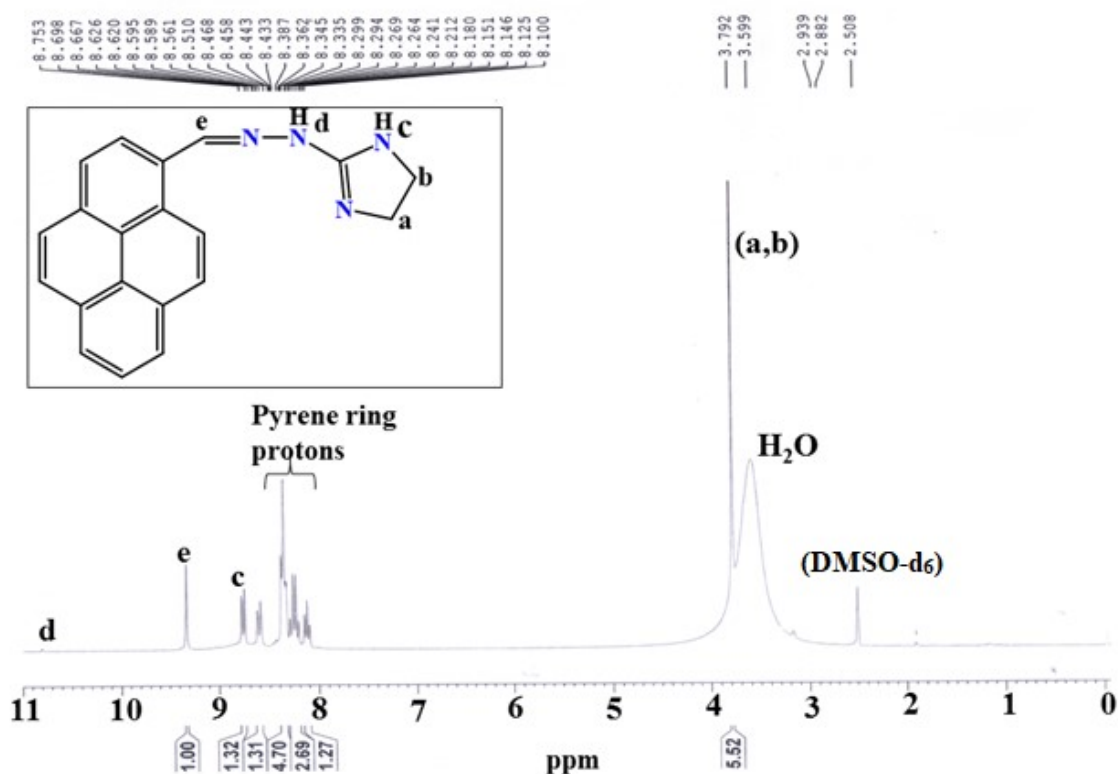

**Figure S1.** <sup>1</sup>H NMR spectrum of PI.

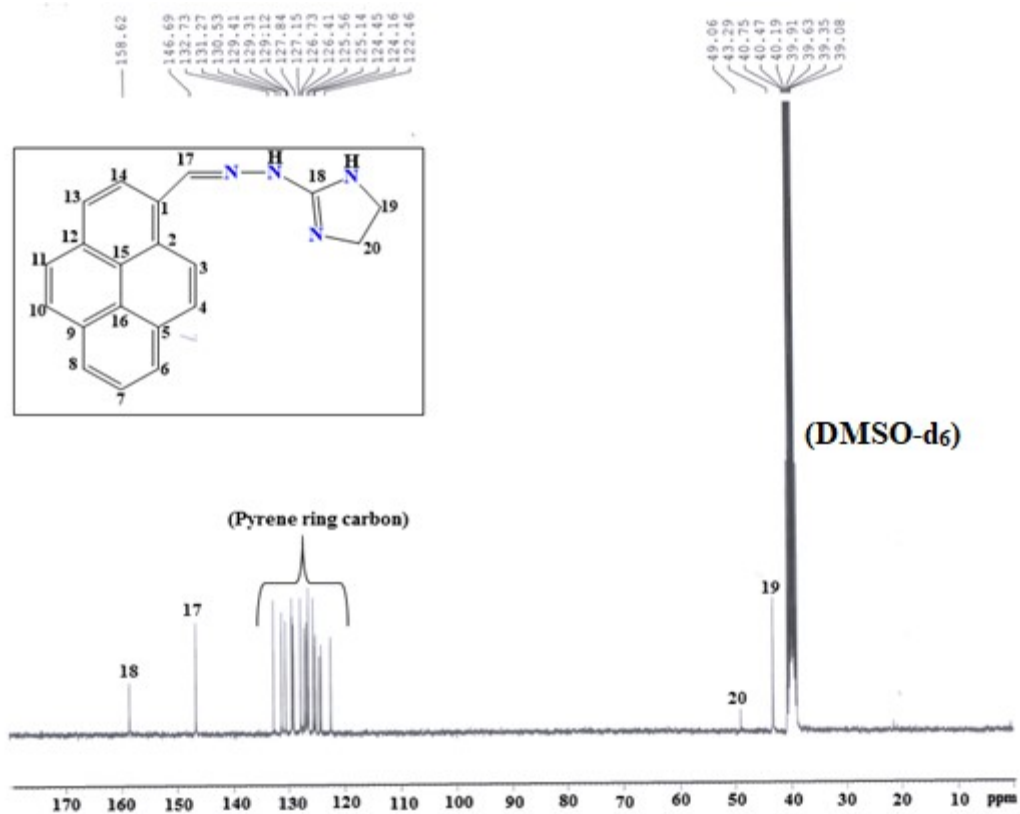

Figure S2. <sup>13</sup>C NMR spectrum of PI.

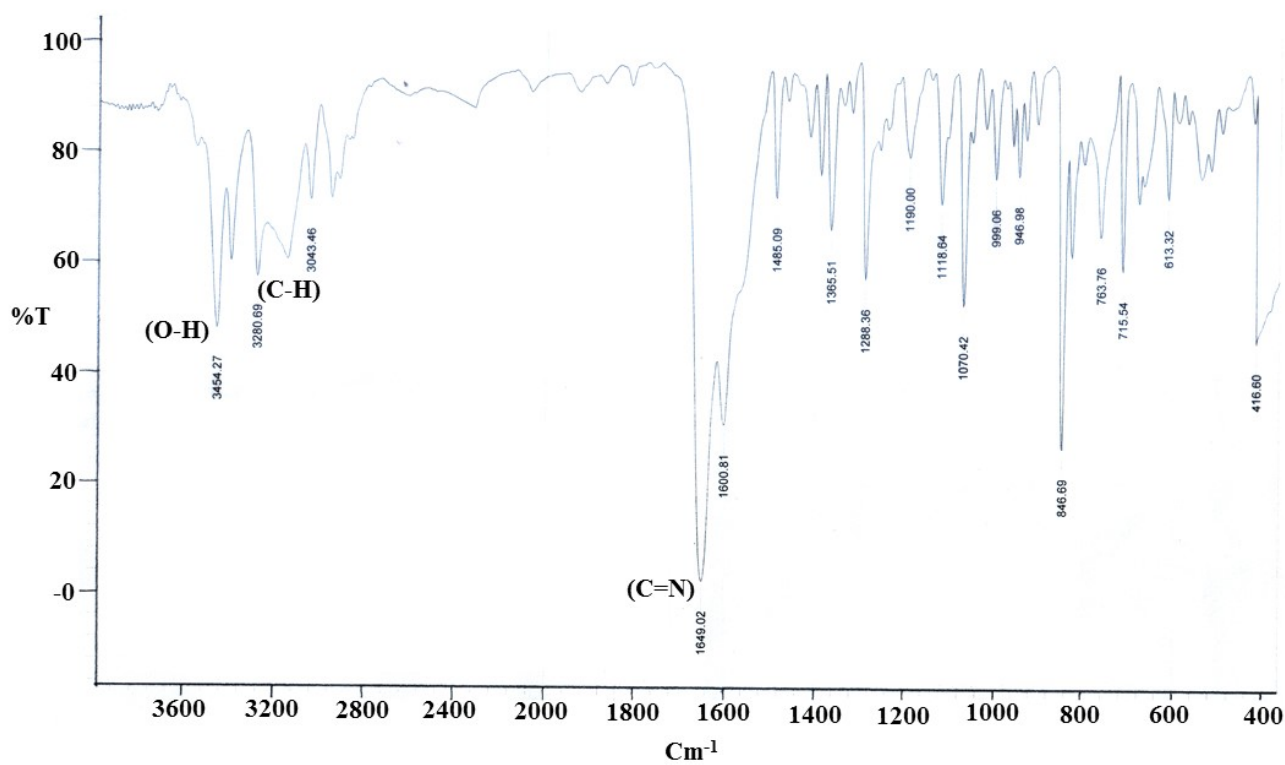

Figure S3. FT-IR spectrum of PI.

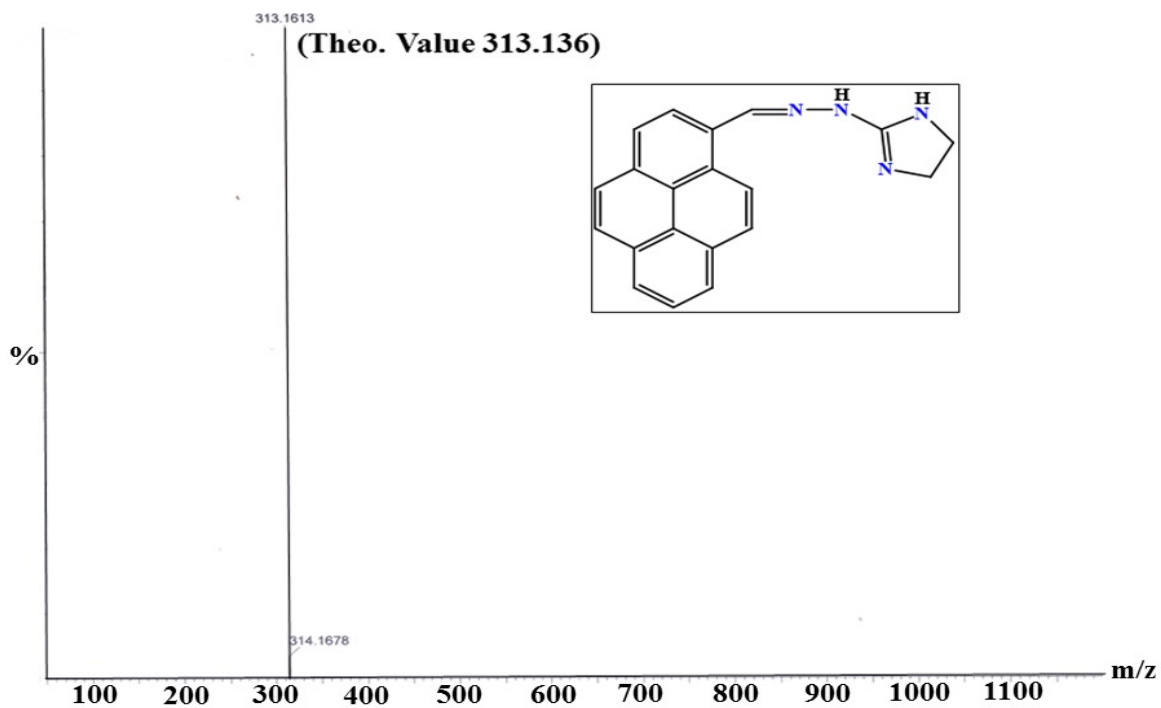

Figure S4. ESI-MS spectrum of PI.

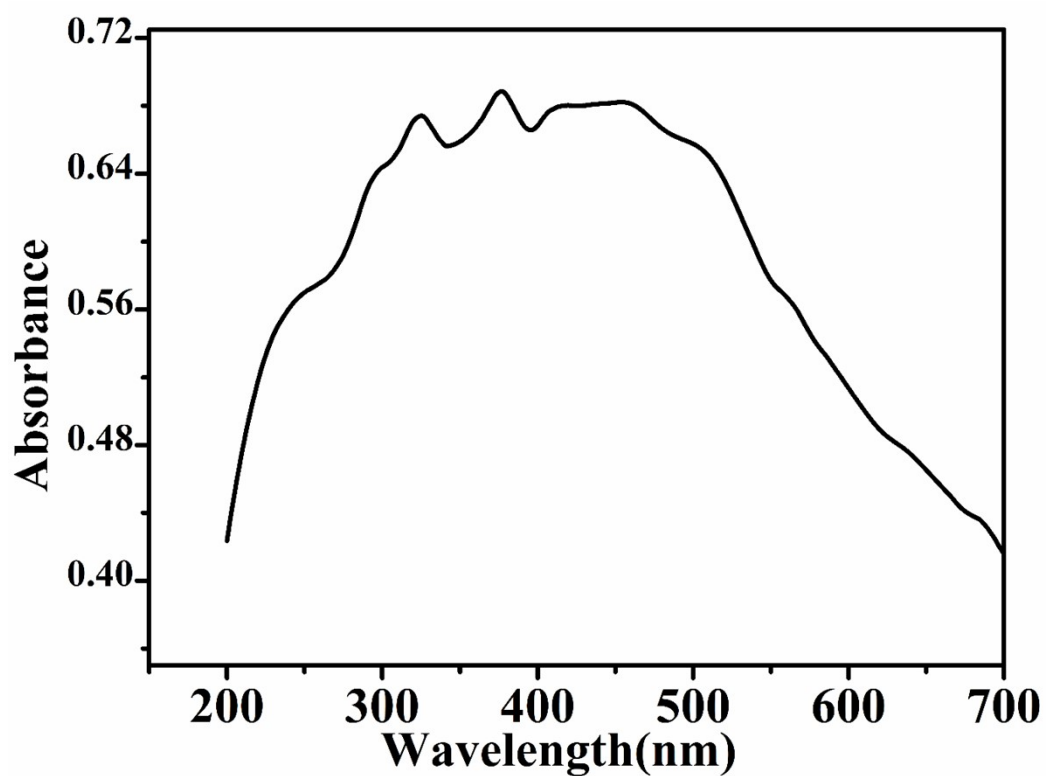

Figure S5. Solid state diffuse reflectance spectrum of PI.

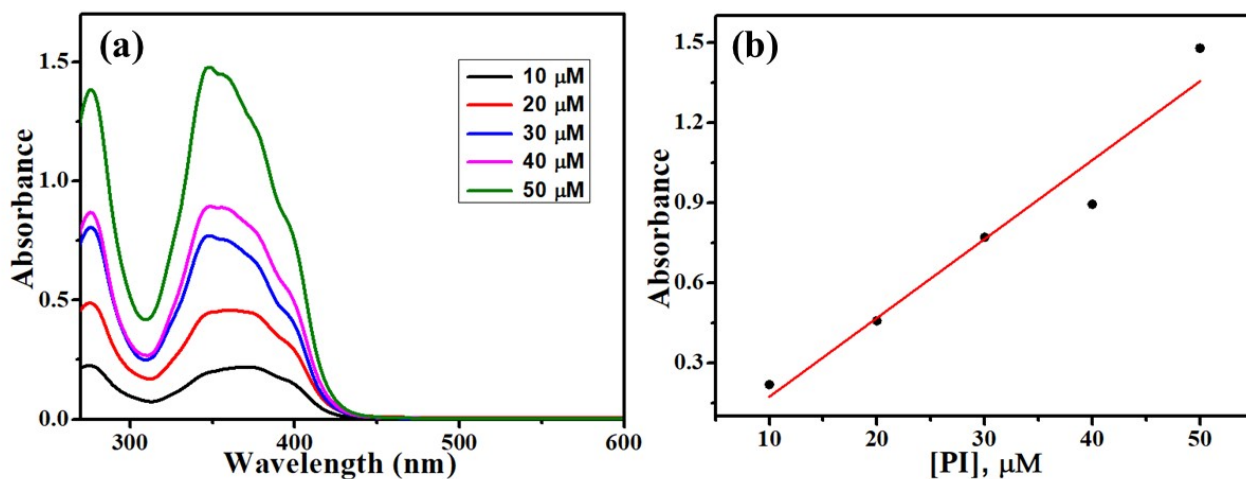

**Figure S6.** (a) Absorption spectra of PI ( $1-5 \times 10^{-5}$  M) in methanol (b) Beer-Lambert plot of PI in methanol.

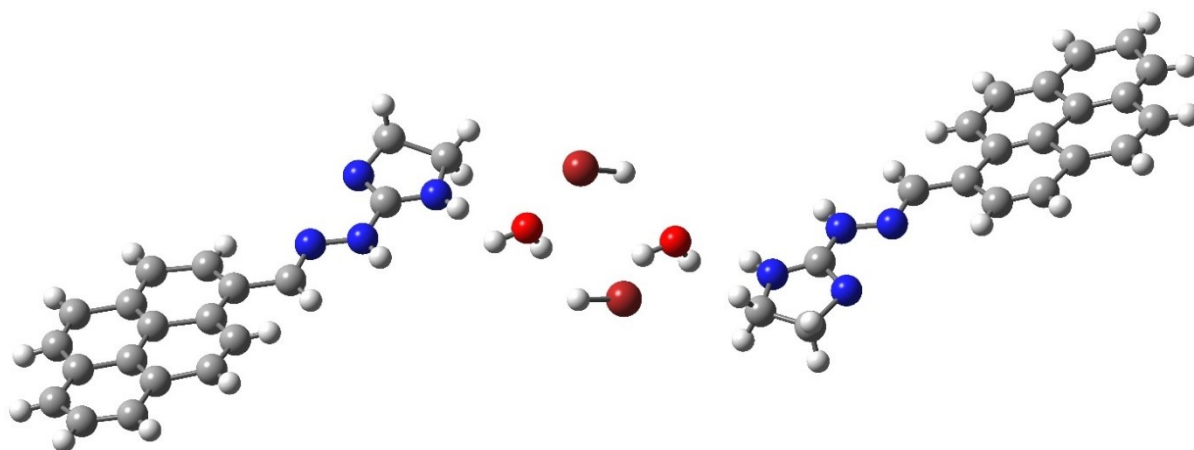

**Figure S7.** Geometry optimized structure of PI (N: blue, O: red, C: grey and H: white shed).

**Table S1.** PI in methanol with increasing percentage of water.

| Sl. No. | PI/MeOH (mL) <sup>#</sup> | Water (mL) | Total volume (mL) | Percentage of water |
|---------|---------------------------|------------|-------------------|---------------------|
| 1       | 2.5                       |            | 2.5               | 0 %                 |
| 2       | 2.25                      | 0.25       | 2.5               | 10 %                |
| 3       | 2                         | 0.5        | 2.5               | 20 %                |
| 4       | 1.75                      | 0.75       | 2.5               | 30 %                |
| 5       | 1.50                      | 1          | 2.5               | 40 %                |
| 6       | 1.25                      | 1.25       | 2.5               | 50 %                |
| 7       | 1                         | 1.5        | 2.5               | 60 %                |
| 8       | 0.75                      | 1.75       | 2.5               | 70 %                |

|    |      |      |     |      |
|----|------|------|-----|------|
| 9  | 0.5  | 2    | 2.5 | 80 % |
| 10 | 0.25 | 2.25 | 2.5 | 90 % |

# taken from stock solution (10  $\mu$ M)
